# Supplementary material for: NO-induced adaptive antiaromaticity in cyclobutadiene
Source: Royal Society of Chemistry journal article supplement (doi:10.1039/d3qo01498c), 2023-01-01
Supplement: d3qo01498c1.pdf [file d3qo01498c1.pdf]

## Supporting Information

### NO-induced adaptive antiaromaticity in cyclobutadiene

Qianqian Deng,<sup>a</sup> Sajid Imran,<sup>b</sup> Jun Yan<sup>b</sup> and Jun Zhu<sup>\*b</sup>

<sup>a</sup>State Key Laboratory of Physical Chemistry of Solid Surfaces, Fujian Provincial Key Laboratory of Theoretical and Computational Chemistry, Department of Chemistry, College of Chemistry and Chemical Engineering, Xiamen University, Xiamen 361005, People's Republic of China.

<sup>b</sup>School of Science and Engineering, The Chinese University of Hong Kong, Shenzhen, Guangdong 518172, China. Email: jun.zhu@cuhk.edu.cn

### Content

|                                                                      |     |
|----------------------------------------------------------------------|-----|
| 1. Test the accuracy of the calculation method .....                 | S1  |
| 2. $\Delta E_{ST}$ ( $E_T - E_S$ ) values of substituted CBD .....   | S2  |
| 3. Dipole moments of substituted CBD.....                            | S3  |
| 4. ACID plots of substituted CBD in the $S_0$ and $T_1$ states ..... | S5  |
| 5. PISO analysis for the $\beta$ orbitals .....                      | S13 |
| 6. Resonance form and FBO order of parent CBD.....                   | S13 |
| 7. Cartesian coordinates of substituted CBD.....                     | S14 |

#### 1. Test the accuracy of the calculation method

Starting from the crystal structure of substituted CBD, we optimized the structure using the computational level of different density functional/6-311+G(d, p), and the key bond lengths are provided in **Table S1**. By comparison, the difference between the experimental results and the calculation results is only 0.29% when the computational level is M06-2X/6-311+G(d, p), which demonstrates that this functional is more suitable for this system.

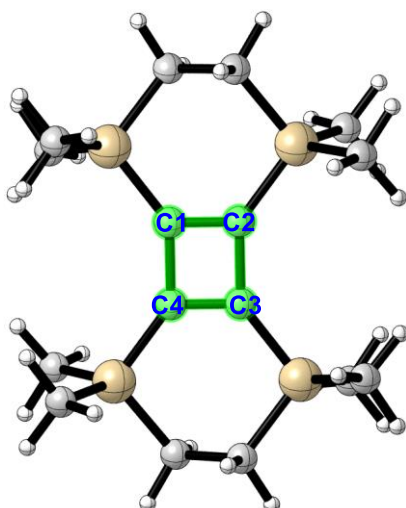

**Figure S1.** Structure of the experimentally synthesized substituted CBD. Highlighted bonds are used for evaluating the accuracy of DFT-optimized geometries in this work (Table S1).

**Table S1.** Optimized and experimental bond lengths (Å) and angles (°) of substituted CBD. The relative deviation is calculated by  $RD = \sum[(BL_{DFT} - BL_{Exp})/BL_{Exp}]/n \times 100\%$  where  $BL_{DFT}$  and  $BL_{Exp}$  are DFT-optimized and experimental bond lengths, respectively (Unit: Å).

|           | C1-C2 | C2-C3 | C3-C4 | C4-C1 | <C1C4C3 | <C2C3C4 | RD(%) |
|-----------|-------|-------|-------|-------|---------|---------|-------|
| Exp.      | 1.353 | 1.577 | 1.364 | 1.582 | 90.12   | 90.29   | 0.00  |
| B3LYP     | 1.358 | 1.587 | 1.358 | 1.587 | 90.00   | 90.00   | 0.37  |
| CAM-B3LYP | 1.349 | 1.578 | 1.349 | 1.578 | 90.00   | 90.00   | 0.36  |
| M06L      | 1.358 | 1.570 | 1.358 | 1.569 | 90.00   | 90.00   | 0.42  |
| OPBE      | 1.366 | 1.576 | 1.366 | 1.576 | 90.00   | 90.00   | 0.33  |
| PBE0      | 1.356 | 1.574 | 1.356 | 1.574 | 90.00   | 90.00   | 0.33  |
| TPSS      | 1.367 | 1.591 | 1.367 | 1.591 | 90.00   | 90.00   | 0.53  |
| M06-2X    | 1.352 | 1.577 | 1.352 | 1.577 | 90.00   | 90.00   | 0.29  |
| wB97X-D   | 1.351 | 1.575 | 1.351 | 1.575 | 90.00   | 90.00   | 0.35  |

## 2. $\Delta E_{ST}$ ( $E_T - E_S$ ) values of substituted CBD

The NO-substituted CBD shows antiaromaticity in the  $T_1$  state whereas the other substituted CBDs display aromaticity, so it is expected that  $\Delta E_{ST}$  of NO-substituted CBDs should be the largest, but the result is the smallest. We hypothesize that there may be strong chemical bonds stabilizing the  $T_1$  state energy and thus leading to a small  $\Delta E_{ST}$ . Since  $\text{NO}_2$  and NO substituents are similar, and the  $\Delta E_{ST}$  of  $\text{NO}_2$ -substituted CBD ( $\text{NO}_2$ -CBD) is larger (11.6 kcal/mol), so we made a comparison based on them. As shown in the Figure S2, firstly, we take NO-substituted CBD (NO-CBD) as a control, keeping the C4-N and N-O bonds unchanged, and make the four-membered ring (4MR) the same

as the 4MR of NO<sub>2</sub>-CBD to obtain **1**. By comparison we find that the electronic energy of **1** is 2.9 kcal/mol higher than that of the compound NO-CBD. Secondly, we keep the 4MR unchanged and make the C4-N bond length 1.408 Å (C4-N bond length in compound NO<sub>2</sub>-CBD) to obtain compound **2**, against which we find that the electronic energy of compound **2** is higher than that of compound NO-CBD by 6.6 kcal/mol. Finally, we keep both the 4MR and the C4-N bond length the same as those in the NO<sub>2</sub>-CBD to obtain compound **3**, we find that the electronic energy of compound **3** is 7.8 kcal/mol higher than that of NO-CBD. Indeedly, the above results suggest that the approximate C4-N double bond (strong C4-N bond) is one of the key factors for stabilizing the energy of NO-CBD in the T<sub>1</sub> state, which results in a small  $\Delta E_{ST}$ .

**Table S2.**  $\Delta E_{ST}$  ( $E_T - E_S$ ) values (kcal/mol) calculated of substituted CBD. Level of theory: CCSD/cc-pvtz//*(U)*M06-2X/6-311+G(d, p).

|                            | H    | CH <sub>3</sub>              | NH <sub>2</sub> | N(CH <sub>3</sub> ) <sub>2</sub> | OH   | OCH <sub>3</sub>  | F    | SiH <sub>3</sub>   | PH <sub>2</sub>   | SH   |
|----------------------------|------|------------------------------|-----------------|----------------------------------|------|-------------------|------|--------------------|-------------------|------|
| $\Delta E_{ST}(E_T - E_S)$ | 12.2 | 13.5                         | 13.8            | 14.1                             | 13.6 | 12.1              | 14.2 | 12.6               | 13.8              | 12.5 |
|                            | Cl   | NH <sub>3</sub> <sup>+</sup> | NO <sub>2</sub> | NO                               | CHO  | COCH <sub>3</sub> | COOH | COOCH <sub>3</sub> | CONH <sub>2</sub> | CN   |
| $\Delta E_{ST}(E_S - E_T)$ | 12.8 | 13.5                         | 11.6            | 0.3                              | 9.2  | 9.9               | 10.8 | 10.5               | 11.2              | 11.2 |

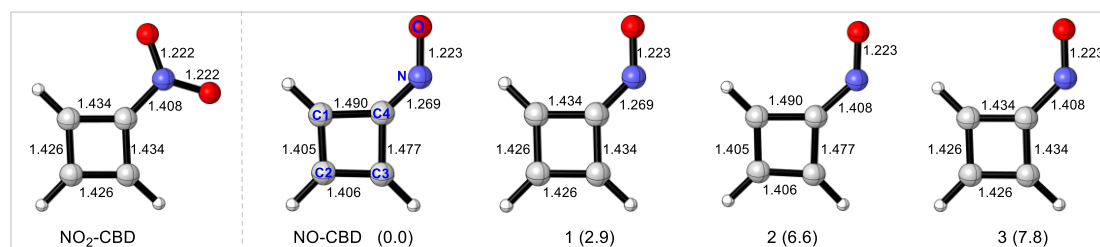

**Figure S2.** Some compounds obtained by changing some key bond lengths in NO-substituted CBD (NO-CBD) and their relative energies (kcal/mol) (relative energies are provided in parentheses).

### 3. Dipole moments of substituted CBD

As we all know, the dipole moment is the magnitude of the charge and the distance between the centers of the positive and negative charges, which has been denoted by the Greek letter ' $\mu$ '. Specifically, dipole moment ( $\mu$ ) = charge ( $q$ ) \* distance of separation ( $d$ ). It is a vector quantity with the direction specified as pointing from the positive charge center to the negative charge center. For the system with charge, the separation of positive and negative charges is more serious, and the dipole moment tends to be larger.

As shown in Table S3, we provide dipole moment of different substituted CBD in the  $S_0$  and  $T_1$  states. For the convenience of the discussion, we have ordered the triplet dipole moments here. In general, electron-withdrawing substituents tend to separate positive and negative charges easily, those of electron-withdrawing substituted CBD that belong to the  $\pi$ -acceptor type substituted CBD possess larger dipole moments in our system. NO substituent is not the strongest  $\pi$  acceptor, so its dipole moment is not much larger than other systems. In a word, there would be a strong connection between the dipole moment and the type of substituent group in the current system.

**Table S3.** Dipole moments of substituted CBD in the  $S_0$  and  $T_1$  states (unit: D).

| Substituent (R)                  | Dipole Moment ( $T_1$ ) | Dipole Moment ( $S_0$ ) |
|----------------------------------|-------------------------|-------------------------|
| H                                | 0.001                   | 0.001                   |
| CH <sub>3</sub>                  | 0.632                   | 0.537                   |
| SiH <sub>3</sub>                 | 0.663                   | 0.596                   |
| PH <sub>2</sub>                  | 0.833                   | 0.814                   |
| SH                               | 0.945                   | 0.900                   |
| Cl                               | 1.277                   | 1.432                   |
| F                                | 1.321                   | 1.571                   |
| OH                               | 1.551                   | 1.818                   |
| OCH <sub>3</sub>                 | 1.694                   | 1.790                   |
| NH <sub>2</sub>                  | 2.094                   | 1.935                   |
| N(CH <sub>3</sub> ) <sub>3</sub> | 2.277                   | 2.215                   |
| NO                               | 3.317                   | 4.415                   |
| COCH <sub>3</sub>                | 3.716                   | 3.332                   |
| CHO                              | 3.985                   | 3.442                   |
| CONH <sub>2</sub>                | 4.018                   | 3.915                   |
| CN                               | 4.572                   | 4.430                   |
| COOCH <sub>3</sub>               | 5.181                   | 4.956                   |
| COOH                             | 5.341                   | 5.092                   |
| NO <sub>2</sub>                  | 5.640                   | 5.041                   |
| NH <sub>3</sub> <sup>+</sup>     | 5.702                   | 5.963                   |

#### 4. ACID plots of substituted CBD in the $S_0$ and $T_1$ states

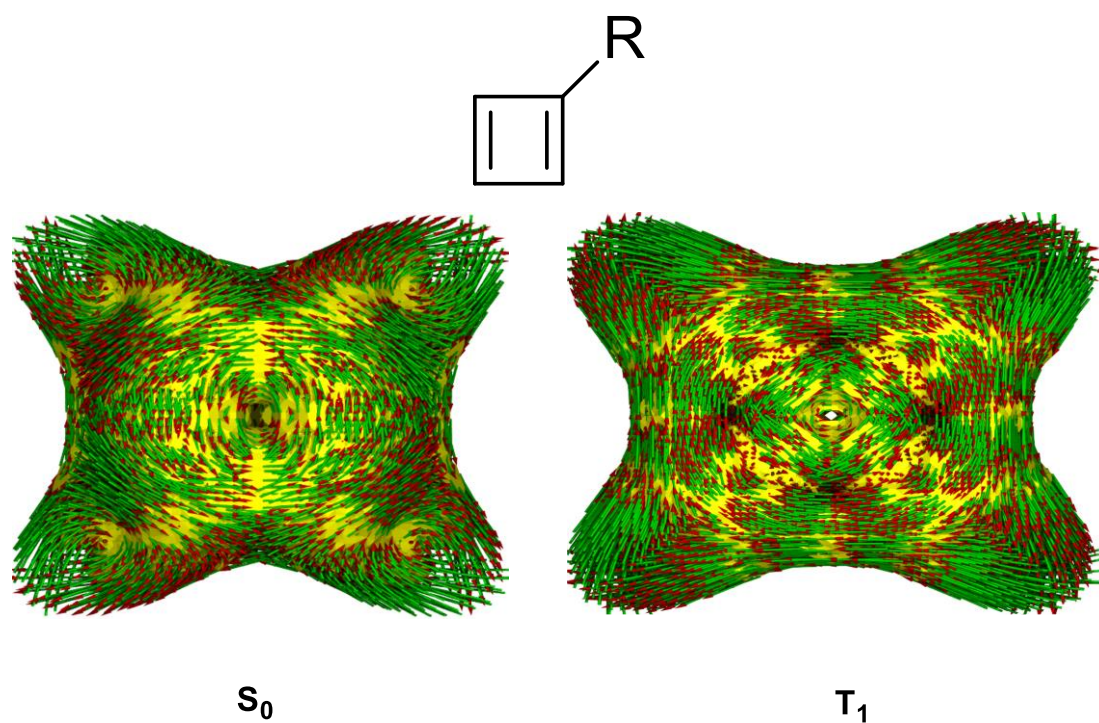

Figure S3. ACID plots in the  $S_0$  and  $T_1$  states when  $R = H$ . Isovalue for density surfaces: 0.035.

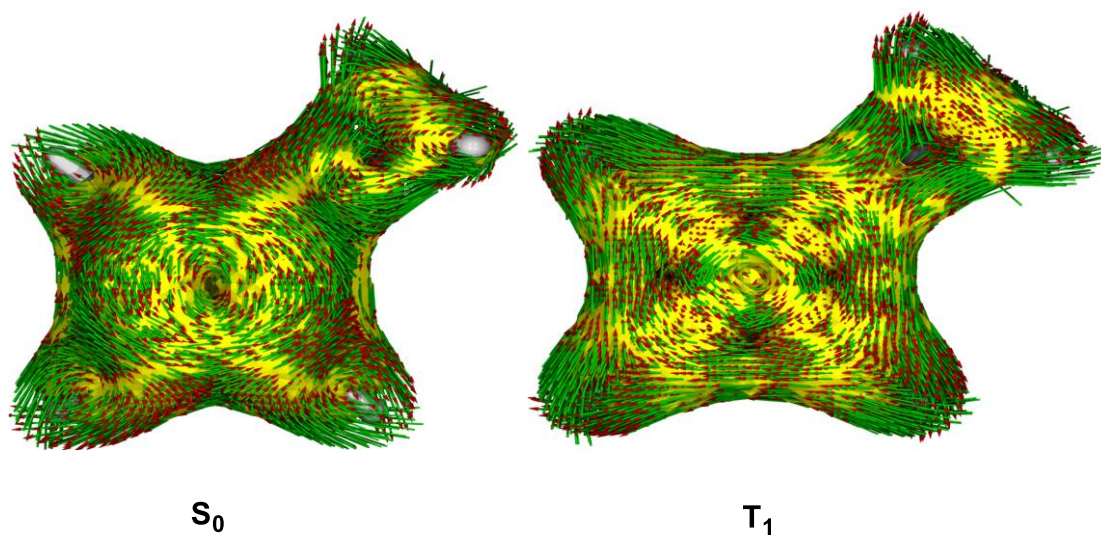

Figure S4. ACID plots in the  $S_0$  and  $T_1$  states when  $R = CH_3$ . Isovalue for density surfaces: 0.035.



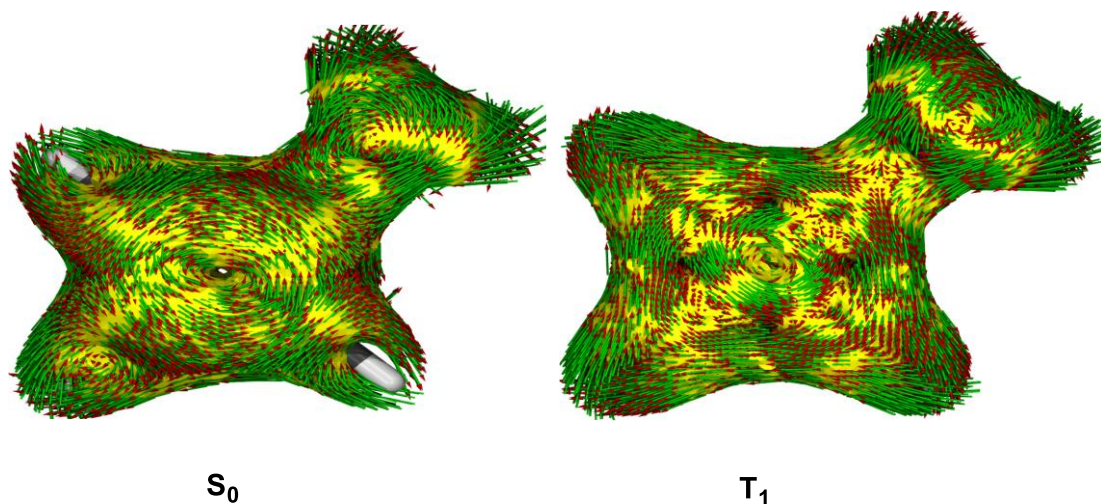

**Figure S5.** ACID plots in the  $S_0$  and  $T_1$  states when  $R = \text{NH}_2$ . Isovalue for density surfaces: 0.035.

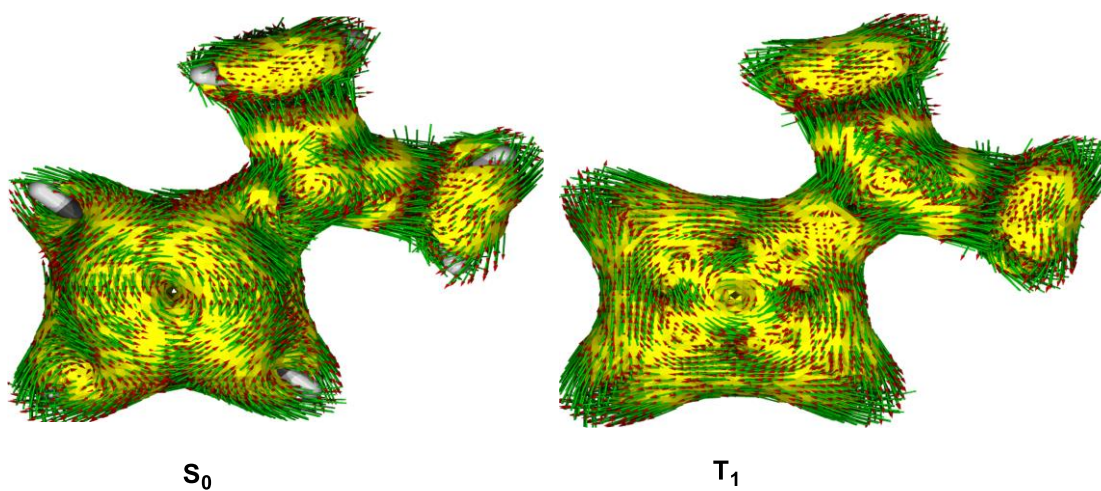

**Figure S6.** ACID plots in the  $S_0$  and  $T_1$  states when  $R = \text{N}(\text{CH}_3)_2$ . Isovalue for density surfaces: 0.035.

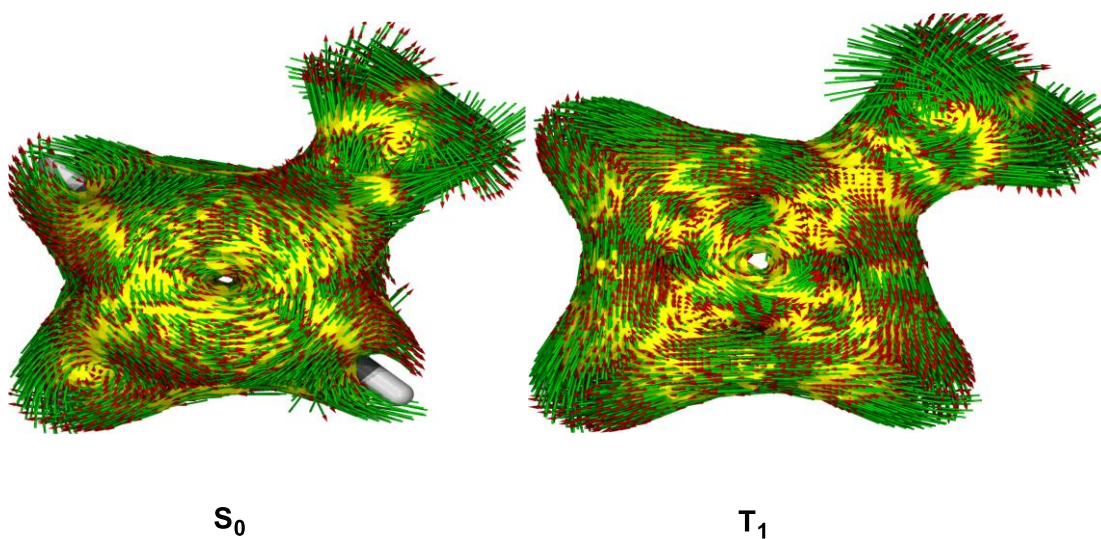

**Figure S7.** ACID plots in the  $S_0$  and  $T_1$  states when  $R = \text{OH}$ . Isovalue for density surfaces: 0.035.

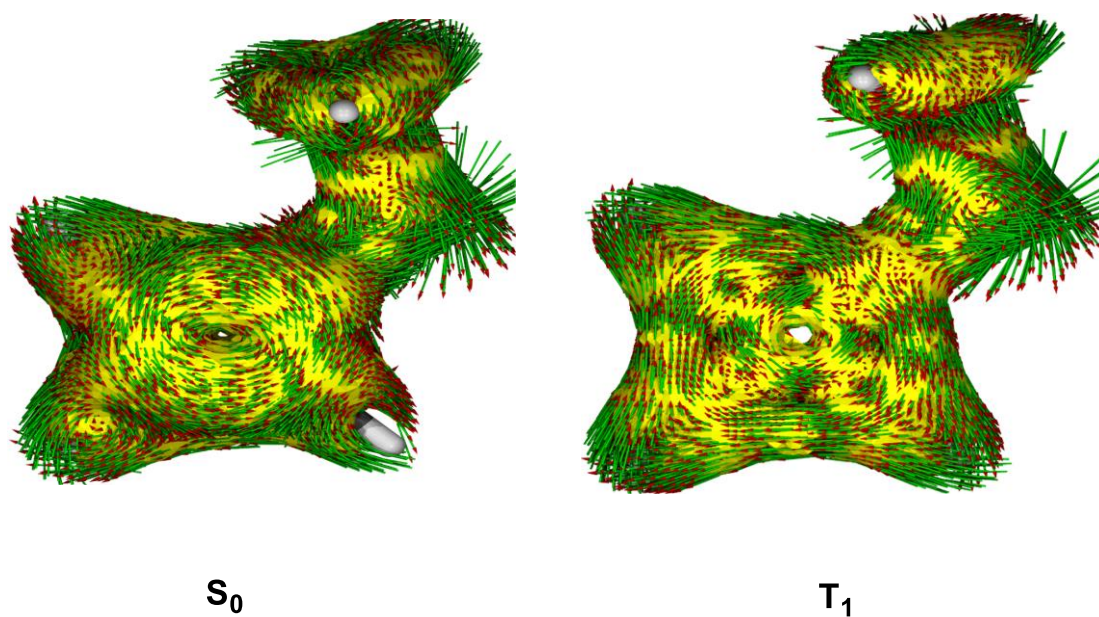

**Figure S8.** ACID plots in the S<sub>0</sub> and T<sub>1</sub> states when R = OCH<sub>3</sub>. Isovalue for density surfaces: 0.035.

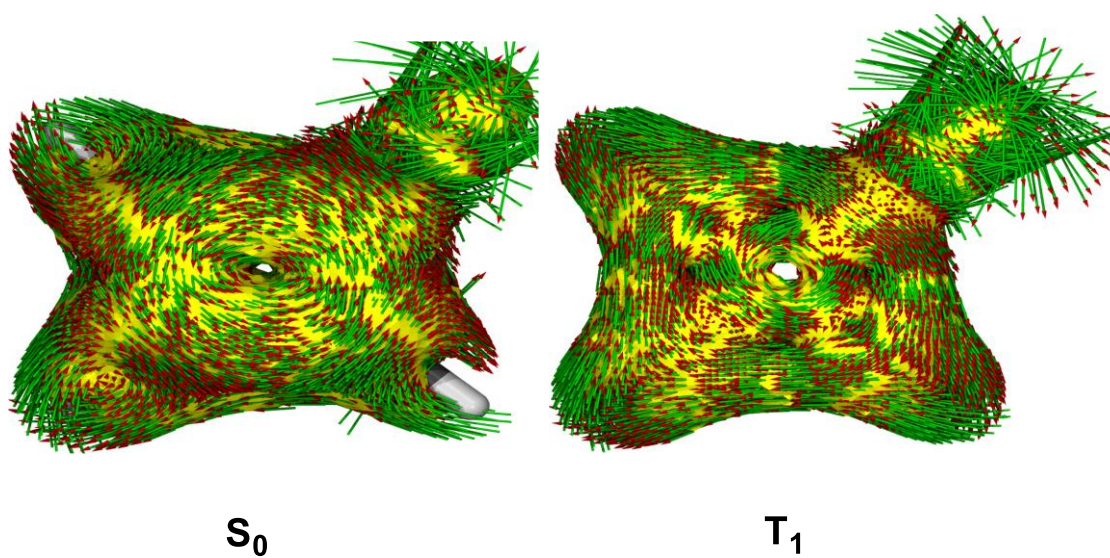

**Figure S9.** ACID plots in the S<sub>0</sub> and T<sub>1</sub> states when R = F. Isovalue for density surfaces: 0.035.



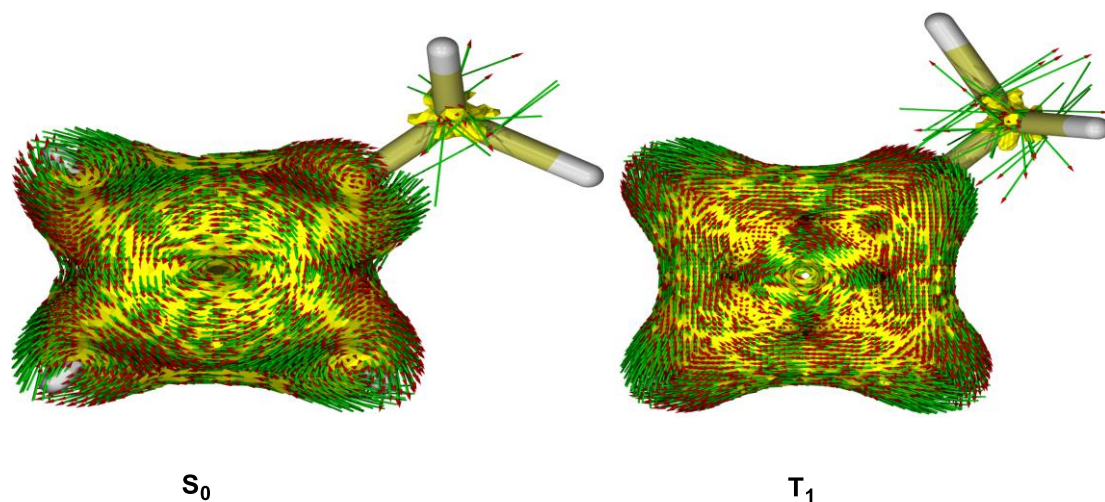

**Figure S10.** ACID plots in the  $S_0$  and  $T_1$  states when  $R = \text{SiH}_3$ . Isovalue for density surfaces: 0.035.

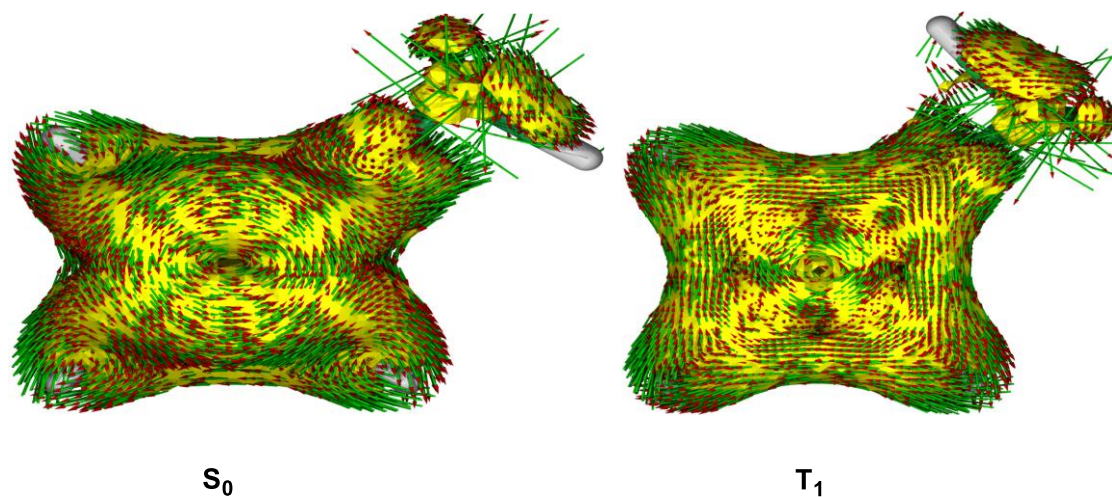

**Figure S11.** ACID plots in the  $S_0$  and  $T_1$  states when  $R = \text{PH}_2$ . Isovalue for density surfaces: 0.035.

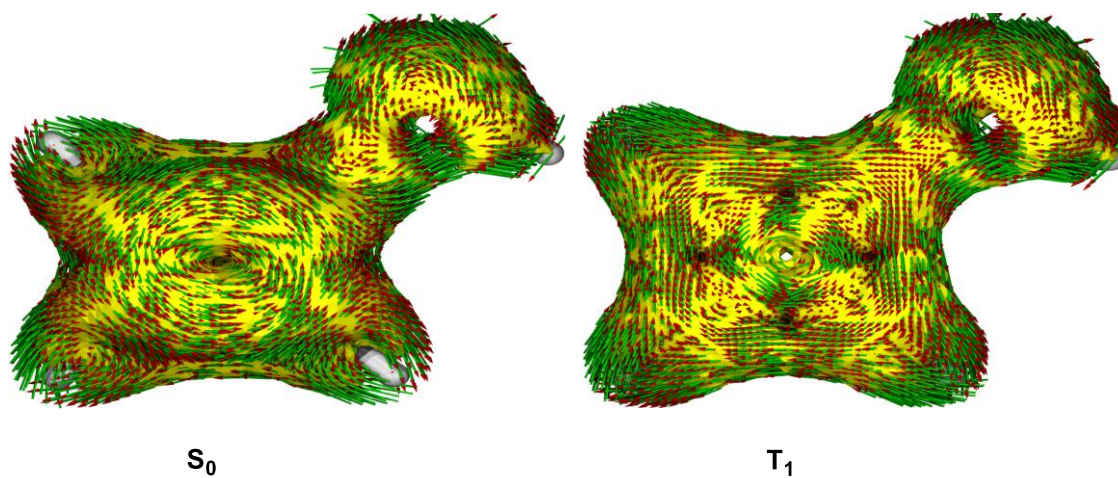

**Figure S12.** ACID plots in the  $S_0$  and  $T_1$  states when  $R = \text{SH}$ . Isovalue for density surfaces: 0.035.



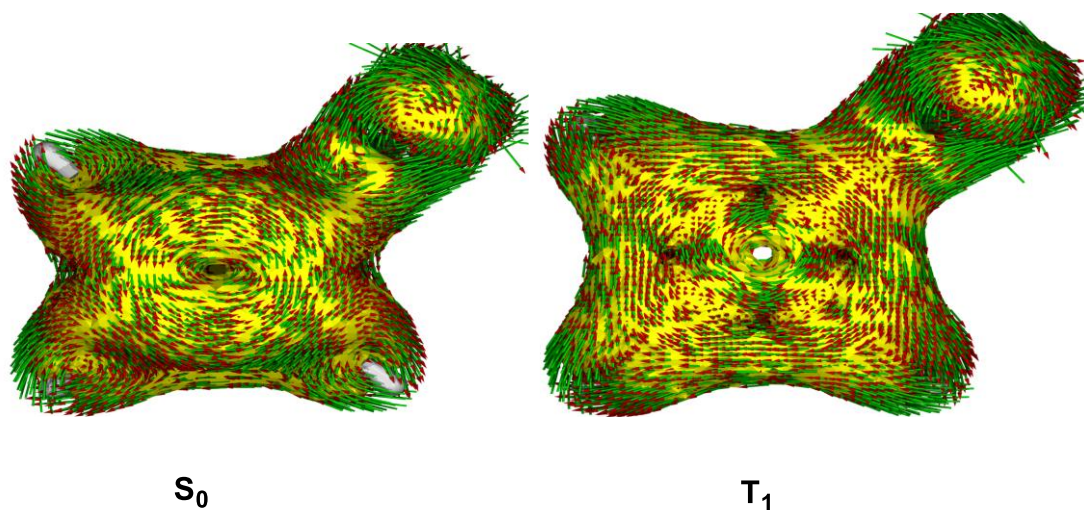

Figure S13. ACID plots in the  $S_0$  and  $T_1$  states when  $R = \text{Cl}$ . Isovalue for density surfaces: 0.035.

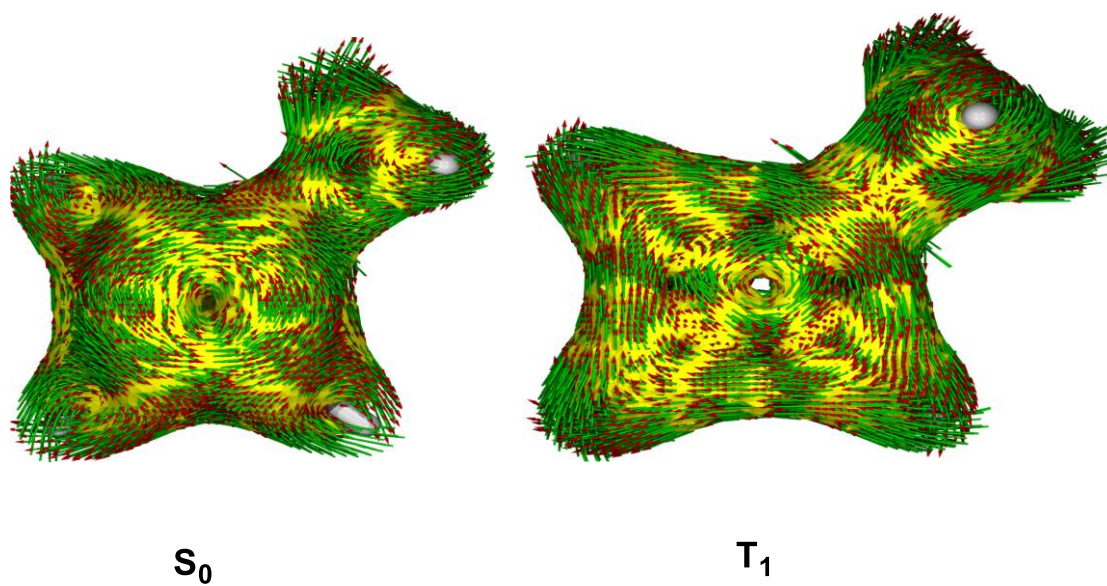

Figure S14. ACID plots in the  $S_0$  and  $T_1$  states when  $R = \text{NH}_3^+$ . Isovalue for density surfaces: 0.035.

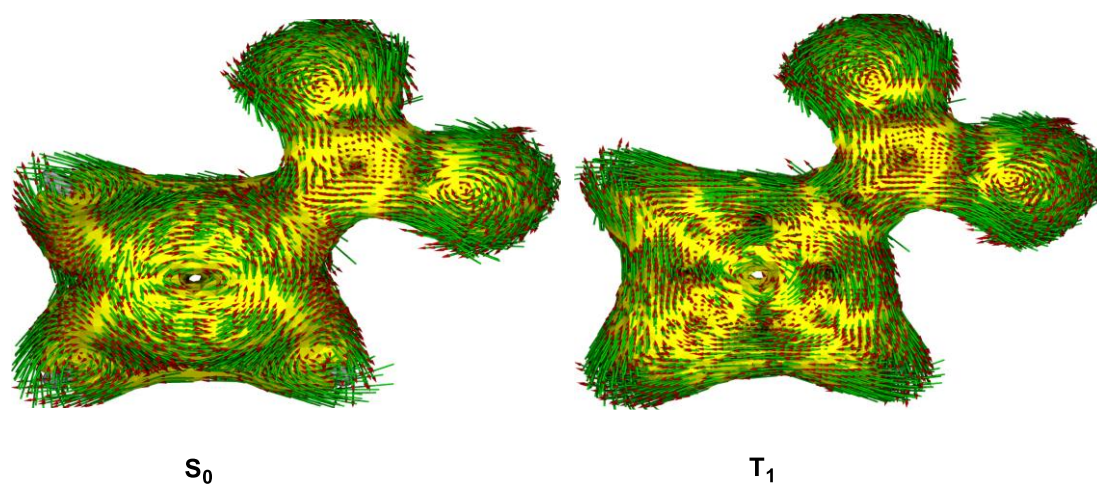

**Figure S15.** ACID plots in the  $S_0$  and  $T_1$  states when  $R = \text{NO}_2$ . Isovalue for density surfaces: 0.035.

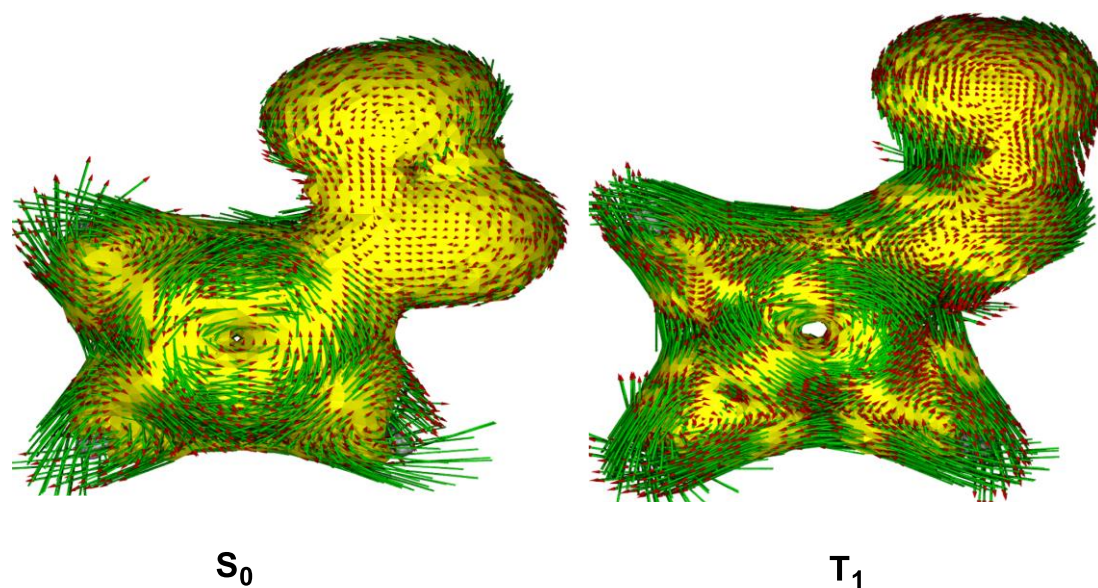

**Figure S16.** ACID plots in the  $S_0$  and  $T_1$  states when  $R = \text{NO}$ . Isovalue for density surfaces: 0.035.

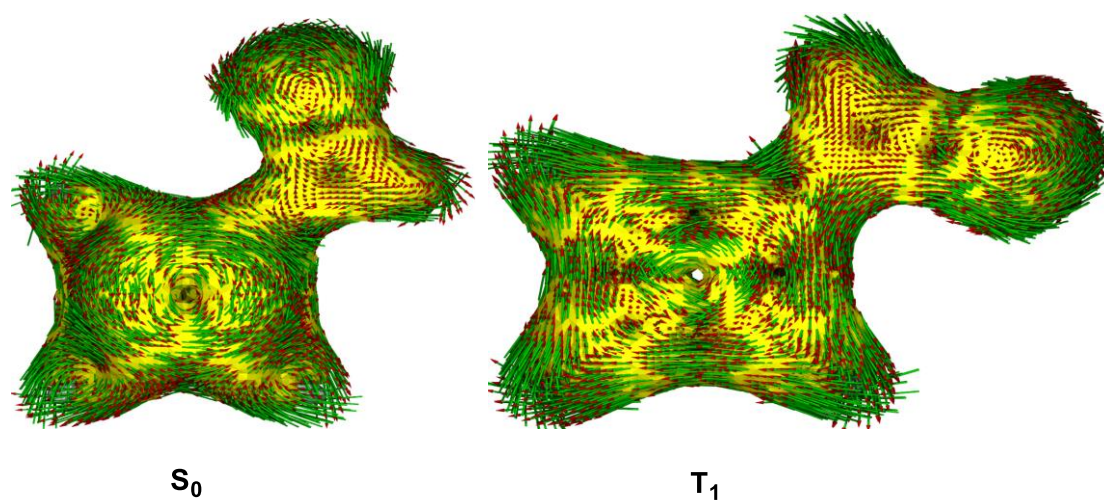

**Figure S17.** ACID plots in the  $S_0$  and  $T_1$  states when  $R = \text{CHO}$ . Isovalue for density surfaces: 0.035.



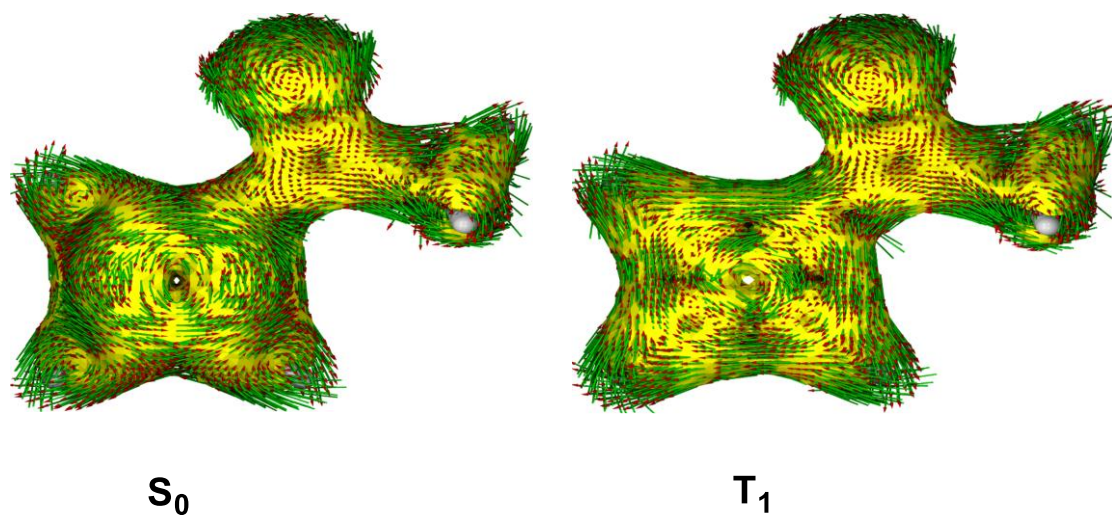

**Figure S18.** ACID plots in the  $S_0$  and  $T_1$  states when  $R = \text{COCH}_3$ . Isovalue for density surfaces: 0.035.

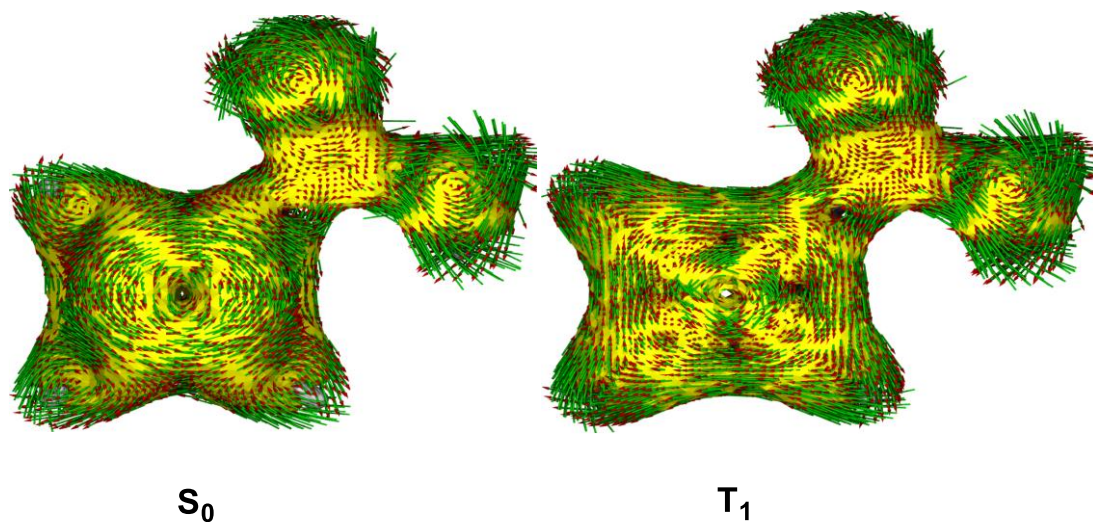

**Figure S19.** ACID plots in the  $S_0$  and  $T_1$  states when  $R = \text{COOH}$ . Isovalue for density surfaces: 0.035.

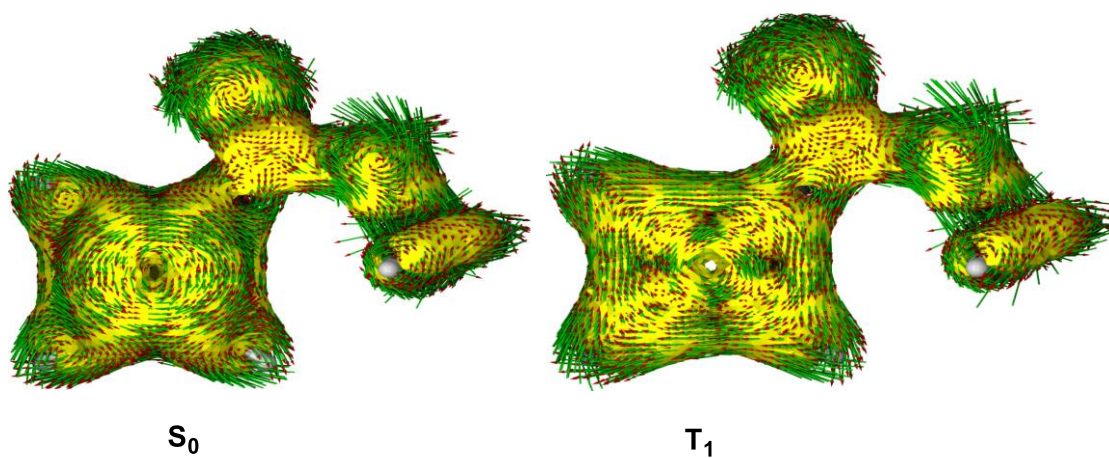

**Figure S20.** ACID plots in the  $S_0$  and  $T_1$  states when  $R = \text{COOCH}_3$ . Isovalue for density surfaces: 0.035.

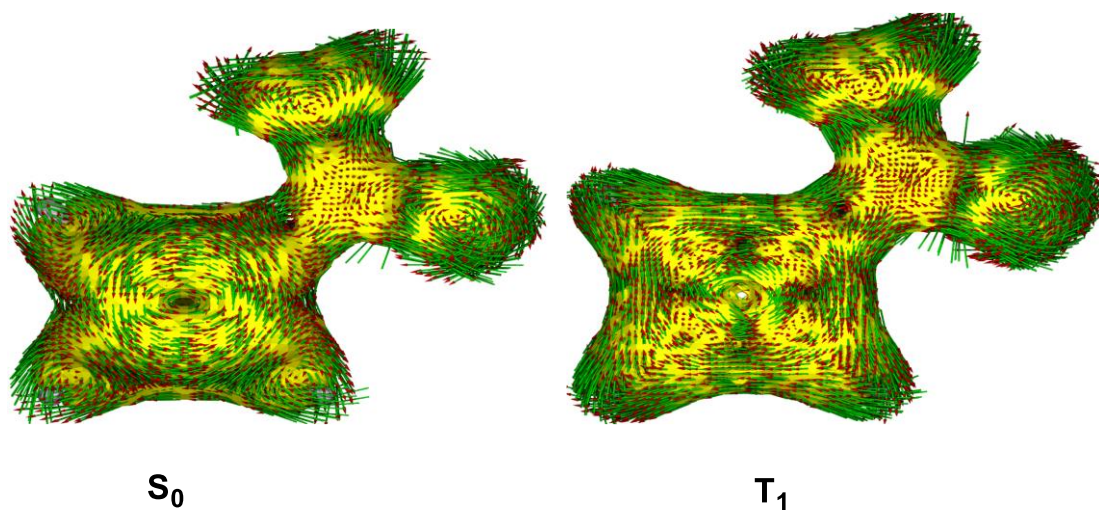

Figure S21. ACID plots in the  $S_0$  and  $T_1$  states when  $R = \text{CONH}_2$ . Isovalue for density surfaces: 0.035.

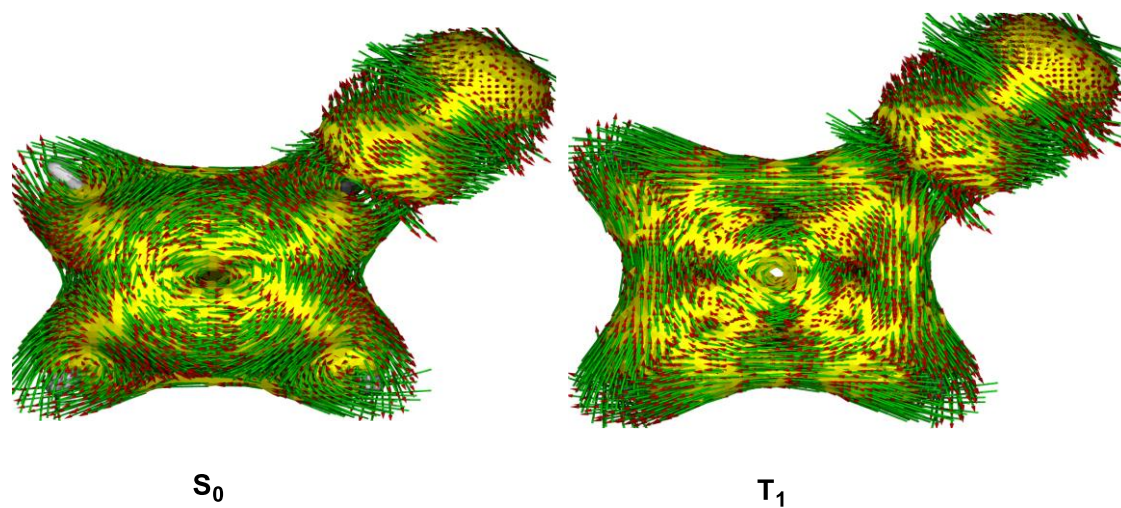

Figure S22. ACID plots in the  $S_0$  and  $T_1$  states when  $R = \text{CN}$ . Isovalue for density surfaces: 0.035.



## 5. PISO analysis for the $\beta$ orbitals

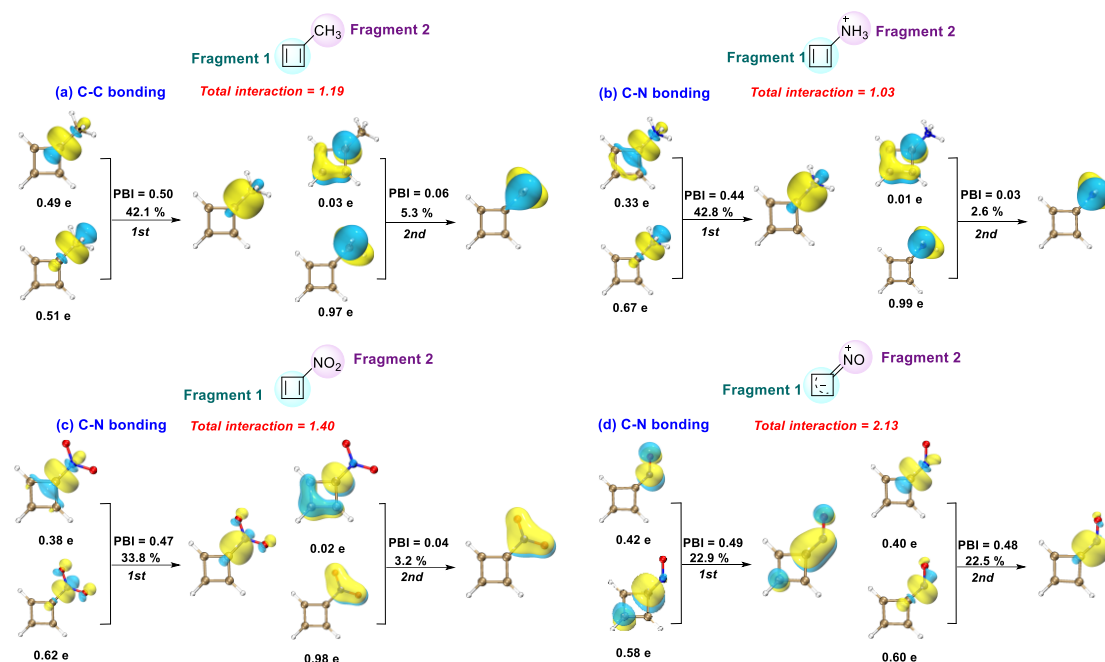

**Figure S23.** (a) PISO analysis for the  $\beta$  orbitals on the C–C bonding interactions in CH<sub>3</sub>-substituted CBD, (b) PISO analysis for the  $\beta$  orbitals on the C–N bonding interactions in NH<sub>3</sub><sup>+</sup>-substituted CBD, (c) PISO analysis for the  $\beta$  orbitals on the C–N bonding interactions in NO<sub>2</sub>-substituted CBD, (d) PISO analysis for the  $\beta$  orbitals on the C–N bonding interactions in NO-substituted CBD. Isovalue: 0.05 a.u.

## 6. Resonance form and FBO order of parent CBD

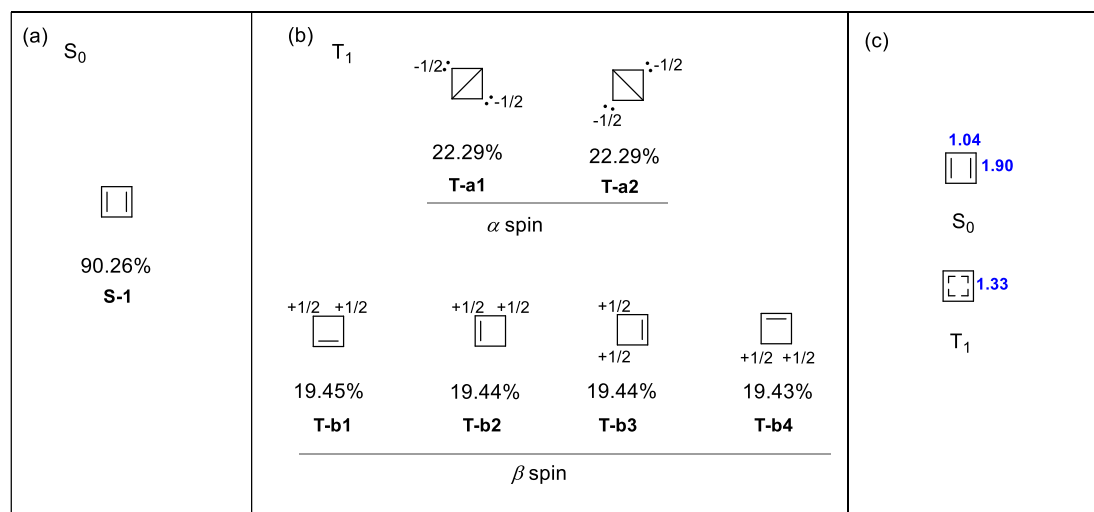

**Figure S24.** NRT analysis (a and b) and bond order (c) of parent CBD in the  $S_0$  and  $T_1$  states.

## 7. Cartesian coordinates of substituted CBD

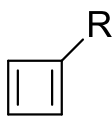

### R = H (S<sub>0</sub>)

E (M06-2X) = -154.645579 a.u.

|   |            |             |             |
|---|------------|-------------|-------------|
| C | 0.00000000 | 0.66483900  | 0.78508700  |
| C | 0.00000000 | 0.66483900  | -0.78508700 |
| C | 0.00000000 | -0.66478000 | -0.78493700 |
| C | 0.00000000 | -0.66478000 | 0.78493700  |
| H | 0.00000000 | 1.43065200  | 1.54752700  |
| H | 0.00000000 | 1.43065200  | -1.54752700 |
| H | 0.00000000 | -1.43100700 | -1.54695300 |
| H | 0.00000000 | -1.43100700 | 1.54695300  |

### R = H (T<sub>i</sub>)

E (M06-2X) = -154.627591 a.u.

|   |            |             |             |
|---|------------|-------------|-------------|
| C | 0.00000000 | 0.71706400  | 0.71702800  |
| C | 0.00000000 | 0.71706400  | -0.71702800 |
| C | 0.00000000 | -0.71697600 | -0.71694000 |
| C | 0.00000000 | -0.71697600 | 0.71694000  |
| H | 0.00000000 | 1.47965900  | 1.48037100  |
| H | 0.00000000 | 1.47965900  | -1.48037100 |
| H | 0.00000000 | -1.48018700 | -1.47967000 |
| H | 0.00000000 | -1.48018700 | 1.47967000  |

### R = CH<sub>3</sub> (S<sub>0</sub>)

E (M06-2X) = -193.957997 a.u.

|   |             |             |             |
|---|-------------|-------------|-------------|
| C | -0.44232400 | -1.05652300 | 0.00014500  |
| C | -1.62284000 | -0.03072700 | -0.00018100 |
| C | -0.76064800 | 0.98144400  | 0.00000600  |
| C | 0.43105000  | -0.05064800 | 0.00019800  |
| H | -0.36345400 | -2.13454800 | -0.00035600 |
| H | -2.70078600 | -0.11372900 | 0.00012800  |
| H | -0.84168600 | 2.05935800  | 0.00016800  |
| C | 1.90269400  | 0.10836300  | -0.00008100 |
| H | 2.23057600  | 0.67080100  | 0.87981500  |
| H | 2.39769900  | -0.86383700 | 0.00004400  |
| H | 2.23006000  | 0.67050900  | -0.88032500 |

**R = CH<sub>3</sub> (T<sub>1</sub>)**

E (M06-2X) = -193.937742 a.u.

|   |             |             |             |
|---|-------------|-------------|-------------|
| C | -0.60160600 | -1.01193400 | -0.00426700 |
| C | -1.61660200 | -0.00000300 | 0.01083600  |
| C | -0.60161100 | 1.01193500  | -0.00426800 |
| C | 0.41894600  | 0.00000200  | -0.01832300 |
| H | -0.59938600 | -2.09209200 | -0.00619900 |
| H | -2.69499600 | -0.00000600 | 0.02067300  |
| H | -0.59939700 | 2.09209300  | -0.00619600 |
| C | 1.90237000  | 0.00000100  | 0.00594900  |
| H | 2.28249700  | 0.00007000  | 1.03410700  |
| H | 2.30114200  | -0.88657200 | -0.49091200 |
| H | 2.30115500  | 0.88649900  | -0.49103600 |

**R = NH<sub>2</sub> (S<sub>0</sub>)**

E (M06-2X) = -210.010220 a.u.

|   |             |             |             |
|---|-------------|-------------|-------------|
| C | -0.43942400 | -1.07849700 | 0.01790000  |
| C | -1.55496300 | -0.00822000 | -0.00254800 |
| C | -0.68328600 | 1.00122900  | 0.00035000  |
| C | 0.45191500  | -0.06926300 | 0.01143600  |
| H | -0.40231700 | -2.15394600 | -0.01062600 |
| H | -2.63590400 | -0.05825000 | -0.01749400 |
| H | -0.72677900 | 2.07888600  | -0.01930200 |
| H | 2.16851800  | 0.99369900  | 0.23742800  |
| H | 2.39395900  | -0.68972100 | 0.07914900  |
| N | 1.79386800  | 0.10826300  | -0.06171200 |

**R = NH<sub>2</sub> (T<sub>1</sub>)**

E (M06-2X) = -209.987786 a.u.

|   |             |             |             |
|---|-------------|-------------|-------------|
| C | -0.56134200 | -1.01495400 | 0.00133400  |
| C | -1.58170300 | -0.00016600 | 0.00352500  |
| C | -0.56167400 | 1.01491200  | 0.00107200  |
| C | 0.44908100  | 0.00019400  | 0.00552500  |
| H | -0.55079100 | -2.09472500 | -0.00886100 |
| H | -2.65777100 | -0.00010900 | 0.02209800  |
| H | -0.55162000 | 2.09469400  | -0.00759300 |
| H | 2.28302600  | 0.84264200  | 0.22730400  |
| H | 2.28207700  | -0.84262400 | 0.22855100  |
| N | 1.81841500  | 0.00003000  | -0.07574700 |

**R = N(CH<sub>3</sub>)<sub>2</sub> (S<sub>0</sub>)**

E (M06-2X) = -288.604748 a.u.

|   |             |            |            |
|---|-------------|------------|------------|
| C | -1.24304000 | 1.08286700 | 0.12346400 |
|---|-------------|------------|------------|

|   |             |             |             |
|---|-------------|-------------|-------------|
| C | -2.35223600 | 0.01813700  | 0.03373500  |
| C | -1.48562000 | -0.98816000 | -0.10323600 |
| C | -0.34762200 | 0.07950000  | -0.03196600 |
| H | -1.21014100 | 2.15576600  | 0.20238800  |
| H | -3.43312400 | 0.06585400  | 0.06297700  |
| H | -1.54424500 | -2.05536800 | -0.24632700 |
| N | 0.98555300  | -0.03826800 | -0.19128600 |
| C | 1.64785600  | -1.28550700 | 0.14249100  |
| H | 2.53662400  | -1.40532900 | -0.48008300 |
| H | 1.95120000  | -1.31308500 | 1.19693800  |
| H | 0.97069800  | -2.11689900 | -0.04701700 |
| C | 1.76836000  | 1.17263700  | -0.04715000 |
| H | 2.75382900  | 1.02320700  | -0.49041600 |
| H | 1.26292500  | 1.98490700  | -0.57121300 |
| H | 1.88717300  | 1.45196800  | 1.00773300  |

**R = N(CH<sub>3</sub>)<sub>2</sub> (T<sub>1</sub>)**

E (M06-2X) = -288.582083 a.u.

|   |             |             |             |
|---|-------------|-------------|-------------|
| C | -1.36029900 | 1.01604900  | -0.00867700 |
| C | -2.37457000 | -0.00001300 | 0.06099800  |
| C | -1.36009100 | -1.01599100 | -0.00810300 |
| C | -0.34652200 | 0.00012600  | -0.08184200 |
| H | -1.35641700 | 2.09576700  | -0.00139300 |
| H | -3.44471100 | -0.00018500 | 0.17630000  |
| H | -1.35653800 | -2.09571800 | -0.00276600 |
| N | 1.00640200  | 0.00000500  | -0.24828000 |
| C | 1.70364200  | -1.22943700 | 0.07475800  |
| H | 2.70724100  | -1.19839300 | -0.35159400 |
| H | 1.78106000  | -1.38328700 | 1.16033900  |
| H | 1.16972000  | -2.07375300 | -0.36184200 |
| C | 1.70385800  | 1.22935300  | 0.07483600  |
| H | 2.70741200  | 1.19821300  | -0.35161100 |
| H | 1.16997400  | 2.07371600  | -0.36170900 |
| H | 1.78134400  | 1.38308200  | 1.16041100  |

**R = OH (S<sub>0</sub>)**

E (M06-2X) = -229.874262 a.u.

|   |             |             |             |
|---|-------------|-------------|-------------|
| C | 0.40601700  | -1.08180200 | -0.00002000 |
| C | 1.53112300  | -0.00046000 | -0.00001000 |
| C | 0.66237200  | 1.00687300  | -0.00004300 |
| C | -0.46948600 | -0.07687900 | -0.00002800 |
| H | 0.36714800  | -2.15714400 | 0.00002600  |
| H | 2.61091300  | -0.05669900 | 0.00013000  |
| H | 0.71264700  | 2.08482900  | 0.00023900  |



|   |             |            |             |
|---|-------------|------------|-------------|
| O | -1.80084400 | 0.01322400 | 0.00007000  |
| H | -2.06410500 | 0.93682300 | -0.00035200 |

**R = OH (T<sub>1</sub>)**

E (M06-2X) = -229.853372 a.u.

|   |             |             |             |
|---|-------------|-------------|-------------|
| C | 0.55688100  | -1.01750100 | 0.00013400  |
| C | 1.54917400  | 0.03018300  | 0.00012400  |
| C | 0.50680400  | 1.02533100  | -0.00007900 |
| C | -0.46203300 | -0.02413200 | -0.00018500 |
| H | 0.56928600  | -2.09584600 | -0.00090100 |
| H | 2.62477100  | 0.05886800  | 0.00021100  |
| H | 0.47342400  | 2.10441600  | -0.00026700 |
| O | -1.79873500 | -0.11469600 | 0.00012000  |
| H | -2.18255800 | 0.76684300  | 0.00003100  |

**R = OCH<sub>3</sub> (S<sub>0</sub>)**

E (M06-2X) = -269.162135 a.u.

|   |             |             |             |
|---|-------------|-------------|-------------|
| C | 1.20598200  | -1.01030800 | 0.10257200  |
| C | 1.96348500  | 0.35298300  | 0.05232200  |
| C | 0.84269300  | 1.05456200  | -0.08886000 |
| C | 0.07468200  | -0.32059400 | -0.05153800 |
| H | 1.48579100  | -2.04869100 | 0.15249700  |
| H | 3.01038100  | 0.61803500  | 0.10502000  |
| H | 0.59059400  | 2.09638700  | -0.21043300 |
| O | -1.20266300 | -0.64022900 | -0.22472000 |
| C | -2.13823900 | 0.36279600  | 0.15488900  |
| H | -1.90904300 | 1.31012400  | -0.33864000 |
| H | -3.11491200 | 0.00902800  | -0.16575000 |
| H | -2.13312100 | 0.50031300  | 1.23874600  |

**R = OCH<sub>3</sub> (T<sub>1</sub>)**

E (M06-2X) = -269.162135 a.u.

|   |             |             |             |
|---|-------------|-------------|-------------|
| C | 1.33318900  | -0.92481700 | 0.00054900  |
| C | 1.98810100  | 0.36339300  | -0.00101300 |
| C | 0.70981600  | 1.02368500  | -0.00006000 |
| C | 0.07358400  | -0.25771400 | 0.00061300  |
| H | 1.64954900  | -1.95569600 | -0.00148800 |
| H | 3.01192100  | 0.69465400  | 0.00320000  |
| H | 0.37791400  | 2.05061100  | -0.00057300 |
| O | -1.17961900 | -0.70503900 | -0.00039600 |
| C | -2.16247600 | 0.31934000  | 0.00013900  |
| H | -2.06129400 | 0.94394200  | -0.89192400 |
| H | -3.12981900 | -0.17627900 | -0.00290100 |
| H | -2.06460500 | 0.93975200  | 0.89548300  |

**R = F (S<sub>0</sub>)**

E (M06-2X) = -253.888012 a.u.

|   |             |             |             |
|---|-------------|-------------|-------------|
| C | -0.32879600 | -1.08724700 | -0.00000500 |
| C | -1.51759300 | -0.04624200 | 0.00000600  |
| C | -0.69115600 | 0.99311800  | -0.00000500 |
| C | 0.47263400  | -0.03508400 | 0.00000100  |
| H | -0.23499800 | -2.15954100 | -0.00000800 |
| H | -2.59122000 | -0.16355300 | 0.00001100  |
| H | -0.77565500 | 2.06763600  | -0.00001000 |
| F | 1.77681500  | 0.14535500  | 0.00000300  |

**R = F (T<sub>1</sub>)**

E (M06-2X) = -253.888012 a.u.

|   |             |             |             |
|---|-------------|-------------|-------------|
| C | -0.50998500 | -1.02939400 | -0.00000100 |
| C | -1.52242200 | 0.00015300  | 0.00000100  |
| C | -0.50963800 | 1.02907800  | -0.00000100 |
| C | 0.46569900  | -0.00009500 | 0.00000000  |
| H | -0.49921100 | -2.10701800 | -0.00000200 |
| H | -2.59852800 | 0.00133900  | 0.00000100  |
| H | -0.49875600 | 2.10671200  | -0.00000100 |
| F | 1.78384100  | 0.00005700  | 0.00000100  |

**R = SiH<sub>3</sub> (S<sub>0</sub>)**

E (M06-2X) = -445.325536 a.u.

|    |             |             |             |
|----|-------------|-------------|-------------|
| C  | -0.94307200 | -1.03293500 | -0.00012600 |
| C  | -2.13924600 | -0.04030600 | 0.00021700  |
| C  | -1.28420100 | 0.97758800  | -0.00004100 |
| C  | -0.05765500 | -0.02884200 | -0.00037900 |
| H  | -0.84859900 | -2.11174400 | 0.00017300  |
| H  | -3.21610700 | -0.13650800 | 0.00025500  |
| H  | -1.37499300 | 2.05517100  | -0.00018800 |
| Si | 1.79306100  | 0.05224000  | 0.00007300  |
| H  | 2.28520800  | 0.77183900  | 1.19821300  |
| H  | 2.31052000  | -1.33493700 | 0.00020600  |
| H  | 2.28614500  | 0.77178700  | -1.19770500 |

**R = SiH<sub>3</sub> (T<sub>1</sub>)**

E (M06-2X) = -445.306842 a.u.

|   |             |             |             |
|---|-------------|-------------|-------------|
| C | -1.12158500 | -1.01201400 | -0.00001000 |
| C | -2.11541100 | 0.01123700  | 0.00003300  |
| C | -1.09904800 | 1.00759200  | -0.00001200 |
| C | -0.06916500 | -0.01324100 | -0.00004600 |
| H | -1.13770800 | -2.09156700 | -0.00002000 |

|    |             |             |             |
|----|-------------|-------------|-------------|
| H  | -3.19586600 | 0.02435900  | 0.00007800  |
| H  | -1.08553700 | 2.08740400  | -0.00002400 |
| Si | 1.78410200  | -0.00061400 | 0.00000800  |
| H  | 2.31745200  | -0.68941000 | 1.19908800  |
| H  | 2.31745100  | -0.69166100 | -1.19776800 |
| H  | 2.23802900  | 1.40804000  | -0.00125900 |

**R = PH<sub>2</sub> (S<sub>0</sub>)**

E (M06-2X) = -496.582515 a.u.

|   |             |             |             |
|---|-------------|-------------|-------------|
| C | -0.91829300 | -1.05291900 | 0.02843900  |
| C | -2.08067400 | -0.01596000 | -0.01570600 |
| C | -1.20526300 | 0.98379400  | -0.00303300 |
| C | -0.02211100 | -0.06271900 | 0.05165600  |
| H | -0.85260300 | -2.13184400 | 0.00794500  |
| H | -3.15954300 | -0.08451100 | -0.03836200 |
| H | -1.26141100 | 2.06270400  | -0.01752800 |
| H | 2.01935100  | 0.66632400  | 1.16299700  |
| H | 2.08369000  | -1.22017100 | 0.26532000  |
| P | 1.76857100  | 0.10628800  | -0.11656700 |

**R = PH<sub>2</sub> (T<sub>1</sub>)**

E (M06-2X) = -496.563942 a.u.

|   |             |             |             |
|---|-------------|-------------|-------------|
| C | -1.04699800 | 1.01275900  | 0.01841100  |
| C | -2.06523300 | 0.01582500  | -0.00709500 |
| C | -1.07373300 | -1.01162700 | -0.00686100 |
| C | -0.02901900 | -0.01254300 | 0.03866500  |
| H | -1.02660500 | 2.09227600  | 0.02726600  |
| H | -3.14462900 | 0.03089200  | -0.00767300 |
| H | -1.08813100 | -2.09082300 | -0.02533900 |
| H | 1.98062900  | 1.30312700  | 0.22443000  |
| H | 2.07392300  | -0.54167100 | 1.18750000  |
| P | 1.76631400  | -0.05468600 | -0.11099300 |

**R = SH (S<sub>0</sub>)**

E (M06-2X) = -552.837347 a.u.

|   |             |             |             |
|---|-------------|-------------|-------------|
| C | 0.90037600  | -1.07219500 | -0.00026300 |
| C | 2.02808500  | 0.00524500  | 0.00018600  |
| C | 1.13859300  | 0.99291800  | 0.00003800  |
| C | 0.00009500  | -0.08561100 | -0.00031100 |
| H | 0.86336100  | -2.15011900 | 0.00070400  |
| H | 3.10844600  | -0.04006600 | 0.00017200  |
| H | 1.16087100  | 2.07167600  | 0.00001800  |
| H | -2.03713300 | -1.16530000 | 0.00058600  |
| S | -1.71865300 | 0.14010400  | 0.00003900  |

**R = SH (T<sub>1</sub>)**

E (M06-2X) = -552.818249 a.u.

|   |             |             |             |
|---|-------------|-------------|-------------|
| C | 1.01073000  | -1.01875000 | -0.00342700 |
| C | 2.02755300  | -0.01345400 | -0.00269600 |
| C | 1.03107000  | 1.01282600  | 0.00485000  |
| C | 0.00249700  | 0.00736500  | 0.00593600  |
| H | 0.99003800  | -2.09788800 | -0.00776600 |
| H | 3.10545000  | -0.02467400 | -0.00266200 |
| H | 1.03427900  | 2.09164900  | 0.00766700  |
| H | -1.92382200 | -1.24192300 | 0.06122100  |
| S | -1.72731600 | 0.08405700  | -0.00540200 |

**R = Cl (S<sub>0</sub>)**

E (M06-2X) = -614.249695 a.u.

|    |             |             |             |
|----|-------------|-------------|-------------|
| C  | -0.86260500 | -1.07434500 | -0.00000700 |
| C  | -2.00899900 | 0.00269700  | 0.00000900  |
| C  | -1.13192100 | 0.99881200  | -0.00000700 |
| C  | 0.00631200  | -0.07246700 | 0.00000100  |
| H  | -0.80944100 | -2.15114900 | -0.00001100 |
| H  | -3.08734300 | -0.06418000 | 0.00001700  |
| H  | -1.15862300 | 2.07704300  | -0.00001300 |
| Cl | 1.70815800  | 0.05941800  | 0.00000200  |

**R = Cl (T<sub>1</sub>)**

E (M06-2X) = -614.230325 a.u.

|    |             |             |             |
|----|-------------|-------------|-------------|
| C  | -0.99553600 | -1.02383900 | -0.00000100 |
| C  | -1.99973200 | 0.00005500  | 0.00000100  |
| C  | -0.99530700 | 1.02367800  | -0.00000100 |
| C  | 0.00290000  | -0.00008200 | 0.00000000  |
| H  | -0.98322000 | -2.10180700 | -0.00000100 |
| H  | -3.07751500 | 0.00099700  | 0.00000200  |
| H  | -0.98288000 | 2.10165200  | -0.00000100 |
| Cl | 1.70409800  | 0.00001700  | 0.00000000  |

**R = NH<sub>3</sub><sup>+</sup> (S<sub>0</sub>)**

E (M06-2X) = -210.339281 a.u.

|   |             |             |             |
|---|-------------|-------------|-------------|
| C | 0.43889500  | -1.07086100 | 0.00004500  |
| C | 1.64660400  | -0.05346400 | -0.00005500 |
| C | 0.82801600  | 0.98992400  | 0.00004300  |
| C | -0.35998300 | -0.02112700 | 0.00000600  |
| H | 0.33722300  | -2.14691300 | 0.00005800  |
| H | 2.71646000  | -0.19614800 | -0.00011700 |
| H | 0.91844500  | 2.06504700  | 0.00007100  |



|   |             |             |             |
|---|-------------|-------------|-------------|
| N | -1.81819600 | 0.11179400  | -0.00002300 |
| H | -2.15186000 | 0.62127100  | 0.82885000  |
| H | -2.15183600 | 0.62124000  | -0.82892500 |
| H | -2.26225300 | -0.81389100 | -0.00001100 |

**R = NH<sub>3</sub><sup>+</sup> (T<sub>1</sub>)**

E (M06-2X) = -210.319563 a.u.

|   |             |             |             |
|---|-------------|-------------|-------------|
| C | -0.63046700 | 1.03290600  | -0.00309500 |
| C | -1.62819200 | -0.00000600 | 0.02156400  |
| C | -0.63047000 | -1.03289000 | -0.00309500 |
| C | 0.34881000  | 0.00000100  | -0.05290100 |
| H | -0.63790700 | 2.11143500  | -0.00255700 |
| H | -2.70687900 | -0.00001300 | 0.02585600  |
| H | -0.63789800 | -2.11142100 | -0.00255400 |
| N | 1.81002700  | 0.00000300  | 0.01732000  |
| H | 2.15943500  | 0.00182400  | 0.98618200  |
| H | 2.19735700  | -0.82804600 | -0.44990000 |
| H | 2.19761600  | 0.82612600  | -0.45311200 |

**R = NO<sub>2</sub> (S<sub>0</sub>)**

E (M06-2X) = -359.134427 a.u.

|   |             |             |             |
|---|-------------|-------------|-------------|
| C | 1.09075300  | -1.07536400 | 0.00005800  |
| C | 2.26721600  | -0.04223100 | 0.00001300  |
| C | 1.41194400  | 0.97627900  | -0.00005400 |
| C | 0.24772000  | -0.05066700 | -0.00002000 |
| H | 0.98779700  | -2.15055100 | 0.00009900  |
| H | 3.34110900  | -0.14587400 | 0.00014500  |
| H | 1.46505600  | 2.05345000  | -0.00036700 |
| N | -1.17729900 | 0.03324600  | 0.00000200  |
| O | -1.65331900 | 1.15349200  | 0.00010500  |
| O | -1.80401400 | -1.00822300 | -0.00008800 |

**R = NO<sub>2</sub> (T<sub>1</sub>)**

E (M06-2X) = -359.119092 a.u.

|   |             |             |             |
|---|-------------|-------------|-------------|
| C | 1.24496700  | -1.03185300 | -0.00010300 |
| C | 2.22927300  | -0.00000500 | -0.00044700 |
| C | 1.24498800  | 1.03185900  | 0.00025500  |
| C | 0.24892200  | -0.00000800 | 0.00084400  |
| H | 1.23273100  | -2.10852800 | 0.00084700  |
| H | 3.30906300  | -0.00004000 | -0.00084200 |
| H | 1.23275500  | 2.10853300  | -0.00024200 |
| N | -1.15932600 | 0.00000400  | 0.00009400  |
| O | -1.71675400 | 1.08772300  | -0.00022800 |
| O | -1.71676800 | -1.08771600 | -0.00023700 |

**R = NO (S<sub>0</sub>)**

E (M06-2X) = -283.938018 a.u.

|   |             |             |             |
|---|-------------|-------------|-------------|
| C | 1.01855600  | 1.02113900  | -0.00031700 |
| C | 1.91278900  | -0.23382400 | -0.00001900 |
| C | 0.84460800  | -1.03366400 | -0.00045600 |
| C | -0.07091900 | 0.23843400  | -0.00001500 |
| H | 1.18074500  | 2.09090900  | -0.00030800 |
| H | 2.98198000  | -0.38212400 | 0.00016500  |
| H | 0.67221200  | -2.09913200 | -0.00065300 |
| N | -1.41499400 | 0.54862700  | 0.00032500  |
| O | -2.14502300 | -0.42531900 | 0.00042000  |

**R = NO (T<sub>1</sub>)**

E (M06-2X) = -283.948322 a.u.

|   |             |             |             |
|---|-------------|-------------|-------------|
| C | 0.79119700  | 1.04965600  | -0.00010500 |
| C | 1.91837000  | 0.21164300  | 0.00078300  |
| C | 1.16686600  | -0.97620800 | -0.00028800 |
| C | -0.06906500 | -0.16674800 | -0.00120600 |
| H | 0.60388900  | 2.11105800  | -0.00215000 |
| H | 2.98007600  | 0.40924200  | 0.00181600  |
| H | 1.38079300  | -2.03268100 | 0.00027800  |
| N | -1.30910400 | -0.43806100 | 0.00000500  |
| O | -2.33065500 | 0.23359400  | 0.00061400  |

**R = CHO (S<sub>0</sub>)**

E (M06-2X) = -267.963058 a.u.

|   |             |             |             |
|---|-------------|-------------|-------------|
| C | -0.63197200 | -1.01211700 | -0.00003700 |
| C | -1.99532700 | -0.27318800 | 0.00011600  |
| C | -1.36865800 | 0.90048400  | 0.00012700  |
| C | 0.02032200  | 0.15736200  | 0.00011200  |
| H | -0.31153600 | -2.04548700 | 0.00082500  |
| H | -3.02661000 | -0.59265900 | -0.00151200 |
| H | -1.68192900 | 1.93502700  | -0.00025000 |
| O | 2.32149800  | -0.31927800 | -0.00014900 |
| C | 1.43806300  | 0.50595900  | 0.00004400  |
| H | 1.67352600  | 1.58633900  | -0.00004200 |

**R = CHO (T<sub>1</sub>)**

E (M06-2X) = -267.952571 a.u.

|   |             |             |             |
|---|-------------|-------------|-------------|
| C | -0.76731200 | -1.03369700 | 0.00029300  |
| C | -1.95044200 | -0.24811300 | -0.00071200 |
| C | -1.21469800 | 0.96104100  | 0.00013200  |
| C | 0.01799900  | 0.18727100  | 0.00132500  |

|   |             |             |             |
|---|-------------|-------------|-------------|
| H | -0.53133100 | -2.08528500 | 0.00124400  |
| H | -3.00582600 | -0.48215000 | -0.00174800 |
| H | -1.46172800 | 2.01099800  | -0.00064600 |
| O | 2.28209200  | -0.38489900 | -0.00063600 |
| C | 1.42272400  | 0.48081500  | 0.00006400  |
| H | 1.69252500  | 1.55173000  | -0.00037400 |

**R = COCH<sub>3</sub> (S<sub>0</sub>)**

E (M06-2X) = -307.278784 a.u.

|   |             |             |             |
|---|-------------|-------------|-------------|
| C | -1.27909600 | -1.02253300 | 0.00032200  |
| C | -2.36164100 | 0.09244600  | 0.00014600  |
| C | -1.41335400 | 1.02540500  | -0.00039800 |
| C | -0.31045400 | -0.10140300 | -0.00028200 |
| H | -1.28078700 | -2.10421900 | 0.00131700  |
| H | -3.44154500 | 0.09638800  | 0.00008900  |
| H | -1.40353400 | 2.10657500  | -0.00051700 |
| O | 1.72089900  | -1.25956800 | -0.00032900 |
| C | 1.15738100  | -0.18701200 | -0.00017600 |
| C | 1.89924600  | 1.12748600  | 0.00037300  |
| H | 1.61664000  | 1.71236100  | -0.87953100 |
| H | 1.61737200  | 1.71092800  | 0.88150700  |
| H | 2.97216900  | 0.94816800  | -0.00014100 |

**R = COCH<sub>3</sub> (T<sub>1</sub>)**

E (M06-2X) = -307.266356 a.u.

|   |             |             |             |
|---|-------------|-------------|-------------|
| C | -1.43142000 | -0.96575700 | -0.00000400 |
| C | -2.32263600 | 0.14037000  | 0.00007600  |
| C | -1.24906200 | 1.06803300  | -0.00003400 |
| C | -0.31324200 | -0.04432600 | -0.00011800 |
| H | -1.52452400 | -2.03964400 | -0.00055600 |
| H | -3.39891700 | 0.23843200  | 0.00045900  |
| H | -1.16419900 | 2.14360000  | -0.00012000 |
| O | 1.62007800  | -1.32801900 | 0.00008400  |
| C | 1.12556200  | -0.21230500 | 0.00000300  |
| C | 1.96328700  | 1.04730400  | 0.00000300  |
| H | 1.73737600  | 1.65159400  | -0.88219400 |
| H | 1.73715500  | 1.65176000  | 0.88203100  |
| H | 3.01755300  | 0.77850100  | 0.00014700  |

**R = COOH (S<sub>0</sub>)**

E (M06-2X) = -343.212548 a.u.

|   |            |             |             |
|---|------------|-------------|-------------|
| C | 1.17323600 | -1.05991900 | -0.00012500 |
| C | 2.33149100 | -0.02296300 | -0.00024600 |
| C | 1.45572600 | 0.97675700  | 0.00015000  |

|   |             |             |             |
|---|-------------|-------------|-------------|
| C | 0.27490900  | -0.07528900 | 0.00071400  |
| H | 1.09639500  | -2.13850400 | -0.00158900 |
| H | 3.40869600  | -0.09508000 | 0.00001200  |
| H | 1.53168300  | 2.05566800  | 0.00005000  |
| O | -1.83995100 | -1.10683800 | 0.00013200  |
| C | -1.19586700 | -0.09873500 | 0.00017300  |
| O | -1.80090300 | 1.11198400  | -0.00049600 |
| H | -1.14690300 | 1.81764200  | 0.00044400  |

**R = COOH (T<sub>1</sub>)**

E (M06-2X) = -343.197811 a.u.

|   |             |             |             |
|---|-------------|-------------|-------------|
| C | 1.32707900  | -1.01408000 | -0.00000900 |
| C | 2.29765900  | 0.02508300  | -0.00016500 |
| C | 1.28655500  | 1.02634800  | 0.00008800  |
| C | 0.28230500  | -0.02084300 | 0.00029100  |
| H | 1.33905800  | -2.09198300 | -0.00044600 |
| H | 3.37733200  | 0.04934100  | -0.00036000 |
| H | 1.28631800  | 2.10593000  | 0.00067700  |
| O | -1.74823800 | -1.18294600 | 0.00006600  |
| C | -1.17103200 | -0.12993700 | 0.00004600  |
| O | -1.86155000 | 1.03667000  | -0.00019800 |
| H | -1.25980100 | 1.78749700  | -0.00032100 |

**R = COOCH<sub>3</sub> (S<sub>0</sub>)**

E (M06-2X) = -382.497282 a.u.

|   |             |             |             |
|---|-------------|-------------|-------------|
| C | 1.66906000  | 0.89836300  | 0.07210900  |
| C | 2.51366600  | -0.40195600 | 0.00770300  |
| C | 1.40440200  | -1.12734800 | -0.07927400 |
| C | 0.53652900  | 0.19673100  | -0.01263800 |
| H | 1.87841300  | 1.95644600  | 0.15393200  |
| H | 3.57095400  | -0.61880400 | 0.02533500  |
| H | 1.18631500  | -2.18238700 | -0.16281800 |
| O | -1.05866600 | 1.90107200  | -0.03208400 |
| C | -0.84499200 | 0.72035700  | -0.02328600 |
| O | -1.88172800 | -0.14108200 | -0.02264300 |
| C | -1.65347800 | -1.54124400 | 0.06283500  |
| H | -1.15420800 | -1.91557000 | -0.83348300 |
| H | -1.07045000 | -1.79522300 | 0.95090600  |
| H | -2.63900600 | -1.99380600 | 0.13924300  |

**R = COOCH<sub>3</sub> (T<sub>1</sub>)**

E (M06-2X) = -382.483273 a.u.

|   |            |             |            |
|---|------------|-------------|------------|
| C | 1.83052500 | 0.77105500  | 0.00001100 |
| C | 2.47158000 | -0.49590100 | 0.00010100 |



|   |             |             |             |
|---|-------------|-------------|-------------|
| C | 1.22382700  | -1.17364500 | -0.00002600 |
| C | 0.54394100  | 0.11464100  | -0.00016300 |
| H | 2.13942000  | 1.80397700  | 0.00006500  |
| H | 3.50179900  | -0.82031900 | 0.00013700  |
| H | 0.92511600  | -2.20903200 | -0.00045500 |
| O | -0.87796400 | 1.94387700  | 0.00004000  |
| C | -0.77626800 | 0.74246900  | -0.00002600 |
| O | -1.89276400 | -0.01471600 | -0.00005200 |
| C | -1.79581700 | -1.43054400 | 0.00009400  |
| H | -1.28403600 | -1.79030000 | -0.89576100 |
| H | -1.28357200 | -1.79006600 | 0.89576900  |
| H | -2.81962800 | -1.79598800 | 0.00039900  |

**R = CONH<sub>2</sub> (S<sub>0</sub>)**

E (M06-2X) = -323.347343 a.u.

|   |             |             |             |
|---|-------------|-------------|-------------|
| C | -1.21399800 | -1.04656500 | -0.00009300 |
| C | -2.34946200 | 0.01930700  | -0.00000500 |
| C | -1.44862500 | 0.99706600  | 0.00010200  |
| C | -0.29613400 | -0.08115000 | -0.00004200 |
| H | -1.16203900 | -2.12628600 | -0.00005000 |
| H | -3.42854300 | -0.02551900 | -0.00007000 |
| H | -1.49701000 | 2.07735700  | 0.00016800  |
| O | 1.79726000  | -1.16648300 | 0.00004500  |
| C | 1.17663200  | -0.12312200 | 0.00001100  |
| H | 2.78635900  | 1.14065200  | -0.00085000 |
| H | 1.25374100  | 1.95811100  | -0.00109500 |
| N | 1.77984800  | 1.10204800  | 0.00024300  |

**R = CONH<sub>2</sub> (T<sub>1</sub>)**

E (M06-2X) = -323.331611 a.u.

|   |             |             |             |
|---|-------------|-------------|-------------|
| C | -1.36235500 | -0.99237000 | -0.02704500 |
| C | -2.31922400 | 0.05997100  | -0.00347200 |
| C | -1.28972500 | 1.04427100  | 0.02641400  |
| C | -0.30280700 | -0.01658000 | 0.00120900  |
| H | -1.38977200 | -2.06977600 | -0.05314700 |
| H | -3.39843500 | 0.09980300  | -0.00380400 |
| H | -1.26726300 | 2.12230700  | 0.07251100  |
| O | 1.69708400  | -1.23835100 | 0.02159200  |
| C | 1.15242300  | -0.14985800 | 0.00399000  |
| H | 2.84964700  | 0.97107000  | -0.11008300 |
| H | 1.39775100  | 1.90038300  | -0.20331400 |
| N | 1.85164600  | 1.03006100  | 0.01693300  |

**R = CN (S<sub>0</sub>)**

E (M06-2X) = -246.888444 a.u.

|   |             |             |             |
|---|-------------|-------------|-------------|
| C | -0.81219400 | -1.04304100 | -0.00002900 |
| C | -1.96459600 | 0.00040000  | -0.00017600 |
| C | -1.08219200 | 0.99400900  | -0.00000400 |
| C | 0.08877800  | -0.05812500 | 0.00024300  |
| H | -0.74842800 | -2.12202800 | -0.00007100 |
| H | -3.04156900 | -0.06743600 | -0.00037300 |
| H | -1.11724100 | 2.07328700  | 0.00001900  |
| C | 1.49880500  | 0.01068100  | 0.00059600  |
| N | 2.64794700  | 0.09894600  | -0.00048000 |

**R = CN (T<sub>1</sub>)**

E (M06-2X) = -246.873520 a.u.

|   |             |             |             |
|---|-------------|-------------|-------------|
| C | -0.94526900 | -1.01952300 | -0.00001200 |
| C | -1.93526800 | -0.00057900 | -0.00020300 |
| C | -0.94622200 | 1.01967500  | -0.00001300 |
| C | 0.08315900  | 0.00031100  | 0.00028600  |
| H | -0.93962600 | -2.09749800 | -0.00003000 |
| H | -3.01463800 | -0.00091200 | -0.00044100 |
| H | -0.94180400 | 2.09764100  | -0.00002900 |
| C | 1.48147800  | 0.00030200  | 0.00063700  |
| N | 2.63839900  | -0.00005000 | -0.00052400 |
